# Supplementary material for: Outcomes of Burkitt lymphoma with central nervous system involvement: evidence from a large multicenter cohort study
Source: PubMed Central journal article supplement — Haematologica. 2021 Feb 4;106(7):1932–42. doi: 10.3324/haematol.2020.270876 (PMC8252937; doi:10.3324/haematol.2020.270876), 2021-02-04

## Outcomes of Burkitt lymphoma with central nervous system involvement: evidence from a large multicenter cohort study

Adam S. Zayac,<sup>1\*</sup> Andrew M. Evens,<sup>2\*</sup> Alexey Danilov,<sup>3</sup> Stephen D. Smith,<sup>4</sup> Deepa Jagadeesh,<sup>5</sup> Lori A. Leslie,<sup>6</sup> Catherine Wei,<sup>2</sup> Seo-Hyun Kim,<sup>7</sup> Seema Naik,<sup>8</sup> Suchitra Sundaram,<sup>9</sup> Nishitha Reddy,<sup>10</sup> Umar Farooq,<sup>11</sup> Vaishalee P Kenkre,<sup>12</sup> Narendranath Epperla,<sup>13</sup> Kristie A. Blum,<sup>14</sup> Nadia Khan,<sup>15</sup> Daulath Singh,<sup>16</sup> Juan P. Alderuccio,<sup>17</sup> Amandeep Godara,<sup>18</sup> Maryam Sarraf Yazdy,<sup>19</sup> Catherine Diefenbach,<sup>20</sup> Emma Rabinovich,<sup>21</sup> Gaurav Varma,<sup>22</sup> Reem Karmali,<sup>23</sup> Yusra Shao,<sup>5</sup> Asaad Trabolsi,<sup>17</sup> Madelyn Burkart,<sup>23</sup> Peter Martin,<sup>22</sup> Sarah Stettner,<sup>21</sup> Ayushi Chauhan,<sup>19</sup> Yun Kyong Choi,<sup>20</sup> Allandria Straker-Edwards,<sup>15</sup> Andreas Klein,<sup>18</sup> Michael C. Churnetski,<sup>14</sup> Kirsten M. Boughan,<sup>24</sup> Stephanie Berg,<sup>16</sup> Bradley M Haverkos,<sup>25</sup> Victor M. Orellana-Noia,<sup>26</sup> Christopher D'Angelo,<sup>12</sup> David A Bond,<sup>13</sup> Seth M. Maliske,<sup>11</sup> Ryan Vaca,<sup>8</sup> Gabriella Magarelli,<sup>6</sup> Amy Sperling,<sup>4</sup> Max J. Gordon,<sup>3</sup> Kevin A. David,<sup>2</sup> Malvi Savani,<sup>27</sup> Paolo Caimi,<sup>24</sup> Manali Kamdar,<sup>25</sup> Matthew A. Lunning,<sup>28</sup> Neil Palmisiano,<sup>29</sup> Parameswaran Venugopal,<sup>7</sup> Craig A Portell,<sup>26</sup> Veronika Bachanova,<sup>27</sup> Tycel Phillips,<sup>30</sup> Izidore S. Lossos<sup>17</sup> and Adam J. Olszewski<sup>1</sup>

<sup>1</sup>Lifespan Cancer Institute, Alpert Medical School of Brown University, Providence, RI; <sup>2</sup>Rutgers Cancer Institute of New Jersey, Robert Wood Johnson University Hospital, New Brunswick, NJ; <sup>3</sup>Knight Cancer Institute, Oregon Health & Science University, Portland, OR; <sup>4</sup>University of Washington/Fred Hutchinson Cancer Research Center, Seattle, WA; <sup>5</sup>Taussig Cancer Institute, Cleveland Clinic, Cleveland, OH; <sup>6</sup>John Theurer Cancer Center, Hackensack University Medical Center, Hackensack, NJ; <sup>7</sup>Rush University Medical Center, Chicago, IL; <sup>8</sup>Penn State Cancer Institute, Penn State University College of Medicine, Hershey, PA; <sup>9</sup>Roswell Park Comprehensive Cancer Center, Buffalo, NY; <sup>10</sup>Vanderbilt University Medical Center, Nashville, TN; <sup>11</sup>University of Iowa Carver College of Medicine, Iowa City, IA; <sup>12</sup>University of Wisconsin Carbone Cancer Center, Madison, WI; <sup>13</sup>The Ohio State University Comprehensive Cancer Center, Columbus, OH; <sup>14</sup>Winship Cancer Institute, Emory University, Atlanta, GA; <sup>15</sup>Fox Chase Cancer Center, Philadelphia, PA; <sup>16</sup>Loyola University Medical Center, Loyola University Chicago, Maywood, IL; <sup>17</sup>Sylvester Comprehensive Cancer Center, University of Miami School of Medicine, Miami, FL; <sup>18</sup>Tufts Medical Center, Boston, MA; <sup>19</sup>Lombardi Comprehensive Cancer Center, Georgetown University Hospital, Washington, DC; <sup>20</sup>New York University School of Medicine, Perlmutter Cancer Center, New York, NY; <sup>21</sup>University of Illinois at Chicago, Chicago, IL; <sup>22</sup>Weill Cornell Medical College, New York, NY; <sup>23</sup>Northwestern University, Chicago, IL; <sup>24</sup>University Hospitals Seidman Cancer Center, Cleveland, OH; <sup>25</sup>University of Colorado Cancer Center, Aurora, CO; <sup>26</sup>University of Virginia School of Medicine, Charlottesville, VA; <sup>27</sup>University of Minnesota, Minneapolis, MN; <sup>28</sup>University of Nebraska Medical Center, Omaha, NE; <sup>29</sup>Sidney Kimmel Cancer Center, Thomas Jefferson University, Philadelphia, PA and <sup>30</sup>University of Michigan, Ann Arbor, MI, USA

\*ASZ and AME contributed equally as co-first authors.

©2021 Ferrata Storti Foundation. This is an open-access paper. doi:10.3324/haematol.2020.270876

Received: September 6, 2020.

Accepted: December 22, 2020.

Pre-published: February 4, 2021.

Correspondence: ADAM J. OLSZEWSKI - adam\_olszewski@brown.edu

### Supplemental Table S1.

Univariate and multivariate logistic models for the association between clinical characteristics and baseline CNS involvement. Non-collinear variables with statistical significance in univariate models were included in the multivariable model.

| Variable                  | Univariate |             |        | Multivariate |             |        |
|---------------------------|------------|-------------|--------|--------------|-------------|--------|
|                           | OR         | 95% CI      | P      | OR           | 95% CI      | P      |
| Age >40                   | 1.29       | (0.85-1.97) | 0.24   |              |             |        |
| Age >60                   | 1.04       | (0.65-1.66) | 0.86   |              |             |        |
| Female sex                | 1.23       | (0.78-1.92) | 0.37   |              |             |        |
| HIV positive              | 2.34       | (1.52-3.60) | 0.001  | 1.84         | (1.12-3.03) | 0.017  |
| B symptoms                | 1.61       | (1.08-2.42) | 0.020  | 0.99         | (0.62-1.58) | 0.96   |
| ECOG 2-4                  | 2.91       | (1.86-4.55) | <0.001 | 2.13         | (1.27-3.57) | 0.004  |
| Hemoglobin <11.5 g/dL     | 2.31       | (1.52-3.50) | <0.001 |              |             |        |
| Albumin <3.5 g/dL         | 2.24       | (1.47-3.42) | <0.001 |              |             |        |
| LDH > ULN                 | 3.45       | (1.73-6.89) | <0.001 |              |             |        |
| LDH >3x ULN *             | 2.53       | (1.67-3.84) | <0.001 | 1.27         | (0.76-2.11) | 0.37   |
| LDH >5x ULN               | 3.08       | (2.02-4.68) | <0.001 |              |             |        |
| ≥2 extranodal sites       | 3.47       | (2.27-5.28) | <0.001 | 2.94         | (1.75-4.94) | <0.001 |
| Extranodal involvement:   |            |             |        |              |             |        |
| Bone marrow               | 5.07       | (3.21-8.00) | <0.001 | 2.80         | (1.59-4.94) | <0.001 |
| Intestine                 | 0.33       | (0.16-0.67) | 0.002  | 0.34         | (0.16-0.72) | 0.005  |
| Liver                     | 1.79       | (1.06-3.00) | 0.028  | 0.60         | (0.32-1.11) | 0.11   |
| Pancreas                  | 0.53       | (0.16-1.79) | 0.31   |              |             |        |
| Pleura/peritoneum         | 0.65       | (0.34-1.24) | 0.19   |              |             |        |
| Kidney/adrenal glands     | 2.61       | (1.44-4.75) | 0.002  | 1.21         | (0.59-2.45) | 0.61   |
| Testis (men only)         | 2.35       | (0.69-7.99) | 0.17   |              |             |        |
| Uterus/ovary (women only) | 2.26       | (0.70-7.28) | 0.17   |              |             |        |
| Female breast             | 1.56       | (0.46-5.33) | 0.48   |              |             |        |

\* All LDH cutoffs, as well as hemoglobin and albumin, were studied, without a significant difference in results. LDH, hemoglobin, and albumin were collinear, so only LDH was included.

CI: confidence interval; CNS: central nervous system; ECOG : Eastern Cooperative Oncology Group performance status; LDH : lactate dehydrogenase; N/A: not applicable; OR: odds ratio; ULN: upper limit of normal

# Supplemental Fig. S1.

**Factors associated with progression-free survival (PFS) and overall survival (OS) among patients with baseline CNS involvement:**

**(A)** PFS according to type of CNS involvement (parenchymal or leptomeningeal / unspecified); **(B)** PFS according to age at diagnosis; **(C)** OS according to type of CNS involvement (parenchymal or leptomeningeal / unspecified); **(D)** OS according to age at diagnosis; **(E)** PFS of patients with parenchymal CNS invasion, according to first-line regimen; **(F)** OS of patients with parenchymal CNS invasion, according to first-line regimen.

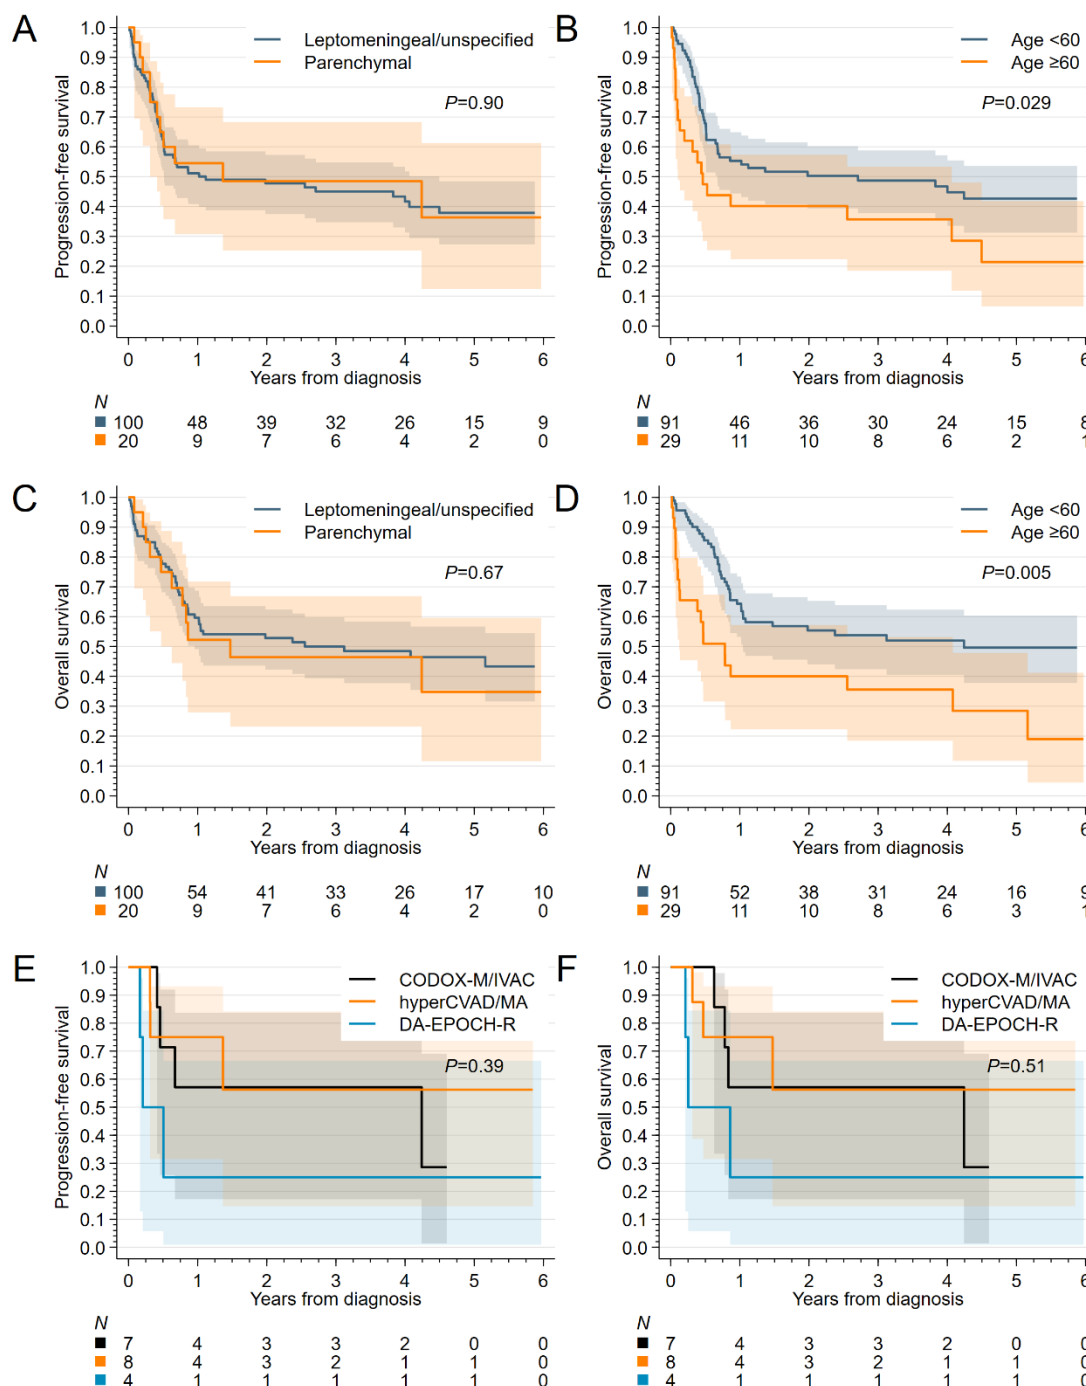

## Supplemental Fig. S2.

### Outcomes of patients with CNS involvement:

(A) Circos plot illustrating association between baseline CNS involvement and subsequent BL recurrence; note that patients with baseline involvement of both parenchymal and leptomeningeal compartments were included in the “parenchymal” category;

(B) overall survival after diagnosis of CNS recurrence; estimates at 12 and 24 months are given.

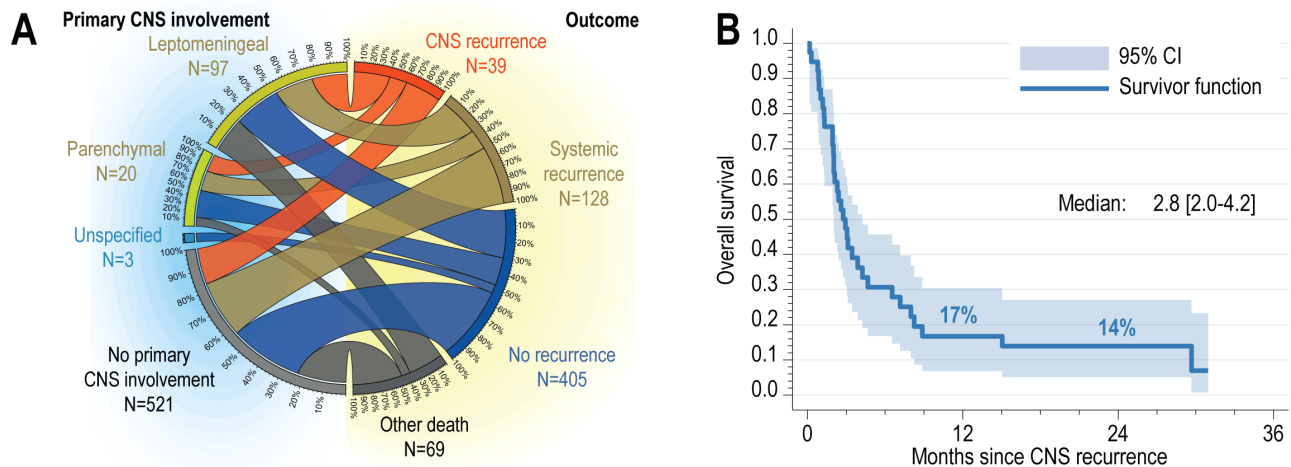

### Supplemental Fig. S3.

**Factors associated with CNS recurrence:** (A) HIV status, (B) performance status, (C) LDH elevation, (D) involvement of  $\geq 2$  extranodal sites, (E) bone marrow involvement, and (F) achievement of complete response (CR) to first-line chemotherapy, among patients with BL ( $N=570$ ) treated with one of the standard NCCN-recommended regimens (CODOX-M/IVAC, hyperCVAD/MA, or DA-EPOCH-R);  $P$ -values are derived from univariate competing risk models.

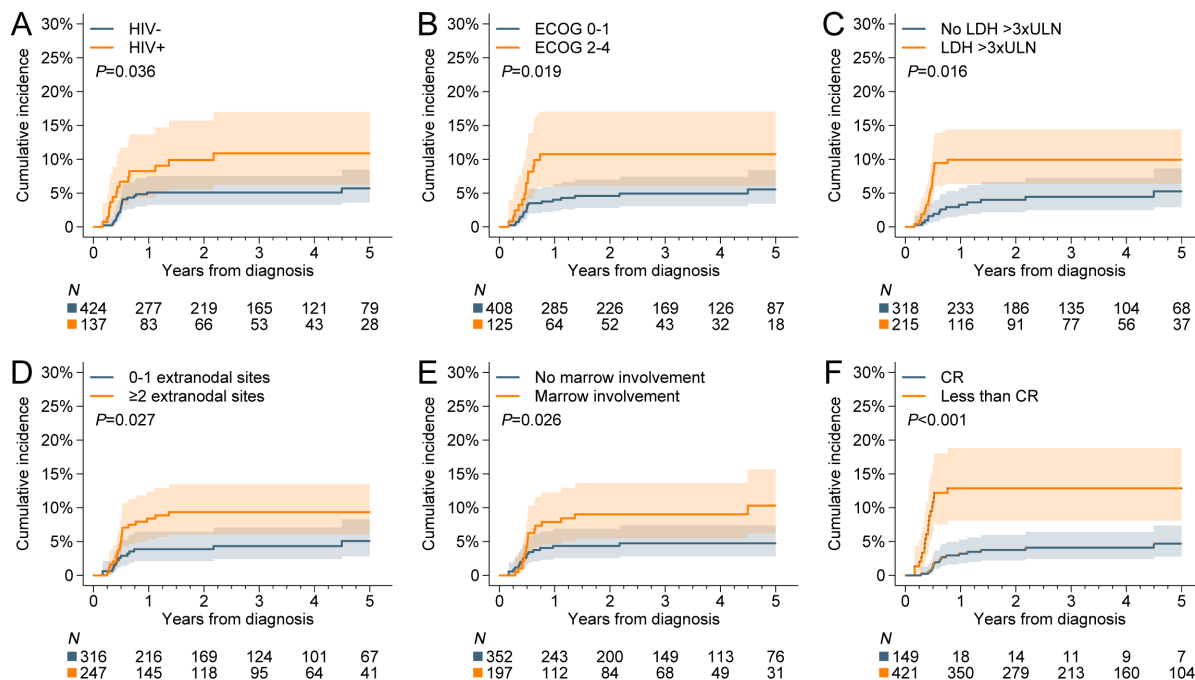

**Supplemental Table S2.**

Patient characteristics stratified by receipt of high-intensity chemotherapy (CODOX-M/IVAC or hyperCVAD/MA) or DA-EPOCH-R.

|                            | CODOX-M/IVAC or<br>hyper-CVAD/MA |       | DA-EPOCH-R |       | P      |
|----------------------------|----------------------------------|-------|------------|-------|--------|
|                            | N                                | %     | N          | %     |        |
| N                          | 389                              | (100) | 181        | (100) |        |
| Age                        |                                  |       |            |       | <0.001 |
| ≤40                        | 163                              | (42)  | 49         | (27)  |        |
| 41 to 60                   | 168                              | (43)  | 67         | (37)  |        |
| >60                        | 58                               | (15)  | 65         | (36)  |        |
| Sex                        |                                  |       |            |       | 0.064  |
| Male                       | 286                              | (74)  | 146        | (81)  |        |
| Female                     | 103                              | (26)  | 35         | (19)  |        |
| HIV infection              | 78                               | (20)  | 59         | (33)  | 0.001  |
| Stage 4                    | 282                              | (73)  | 131        | (72)  | 0.79   |
| B symptoms                 | 186                              | (48)  | 83         | (46)  | 0.53   |
| ECOG 2-4                   | 71                               | (18)  | 54         | (30)  | 0.002  |
| Hemoglobin <11.5 g/dL      | 113                              | (29)  | 62         | (34)  | 0.20   |
| Albumin <3.5 g/dL          | 134                              | (34)  | 87         | (48)  | <0.001 |
| LDH                        |                                  |       |            |       |        |
| > ULN                      | 280                              | (72)  | 131        | (72)  | 0.72   |
| >3x ULN                    | 151                              | (39)  | 64         | (35)  | 0.31   |
| >5x ULN                    | 108                              | (28)  | 41         | (23)  | 0.14   |
| ≥2 extranodal sites        | 162                              | (42)  | 85         | (47)  | 0.27   |
| Extranodal involvement:    |                                  |       |            |       |        |
| CNS                        | 74                               | (19)  | 35         | (19)  | 0.93   |
| Marrow                     | 136                              | (35)  | 61         | (34)  | 0.73   |
| Intestine                  | 60                               | (15)  | 41         | (23)  | 0.035  |
| Liver                      | 51                               | (13)  | 27         | (15)  | 0.56   |
| Pancreas                   | 15                               | (4)   | 9          | (5)   | 0.54   |
| Pleura/Peritoneum          | 56                               | (14)  | 24         | (13)  | 0.72   |
| Kidney/adrenal             | 34                               | (9)   | 15         | (8)   | 0.86   |
| Testis <sup>a</sup>        | 10                               | (4)   | 2          | (1)   | 0.20   |
| Uterus/ovary <sup>a</sup>  | 12                               | (12)  | 0          | (0)   | 0.035  |
| Female breast <sup>a</sup> | 9                                | (9)   | 4          | (11)  | 0.64   |

<sup>a</sup> Percentages and P values calculated for men or women only, as pertinent.

CNS: central nervous system; ECOG : Eastern Cooperative Oncology Group performance status; LDH : lactate dehydrogenase; N/A: not applicable; ULN: upper limit of normal

## Supplemental Fig. S4.

**Cumulative incidence of CNS recurrence according to first-line chemotherapy regimen: (A) patients age  $\leq 60$ ; (B) patients age  $>60$ ; (C) patients with performance status ECOG 0-1; (D) patients with performance status ECOG 2-4; (E) patients without HIV infection; (F) patients with HIV infection; subhazard ratios (SHR) were derived from univariate competing risk models comparing hyperCVAD versus CODOX-M/IVAC, or DA-EPOCH-R versus both high-intensity regimens combined.**

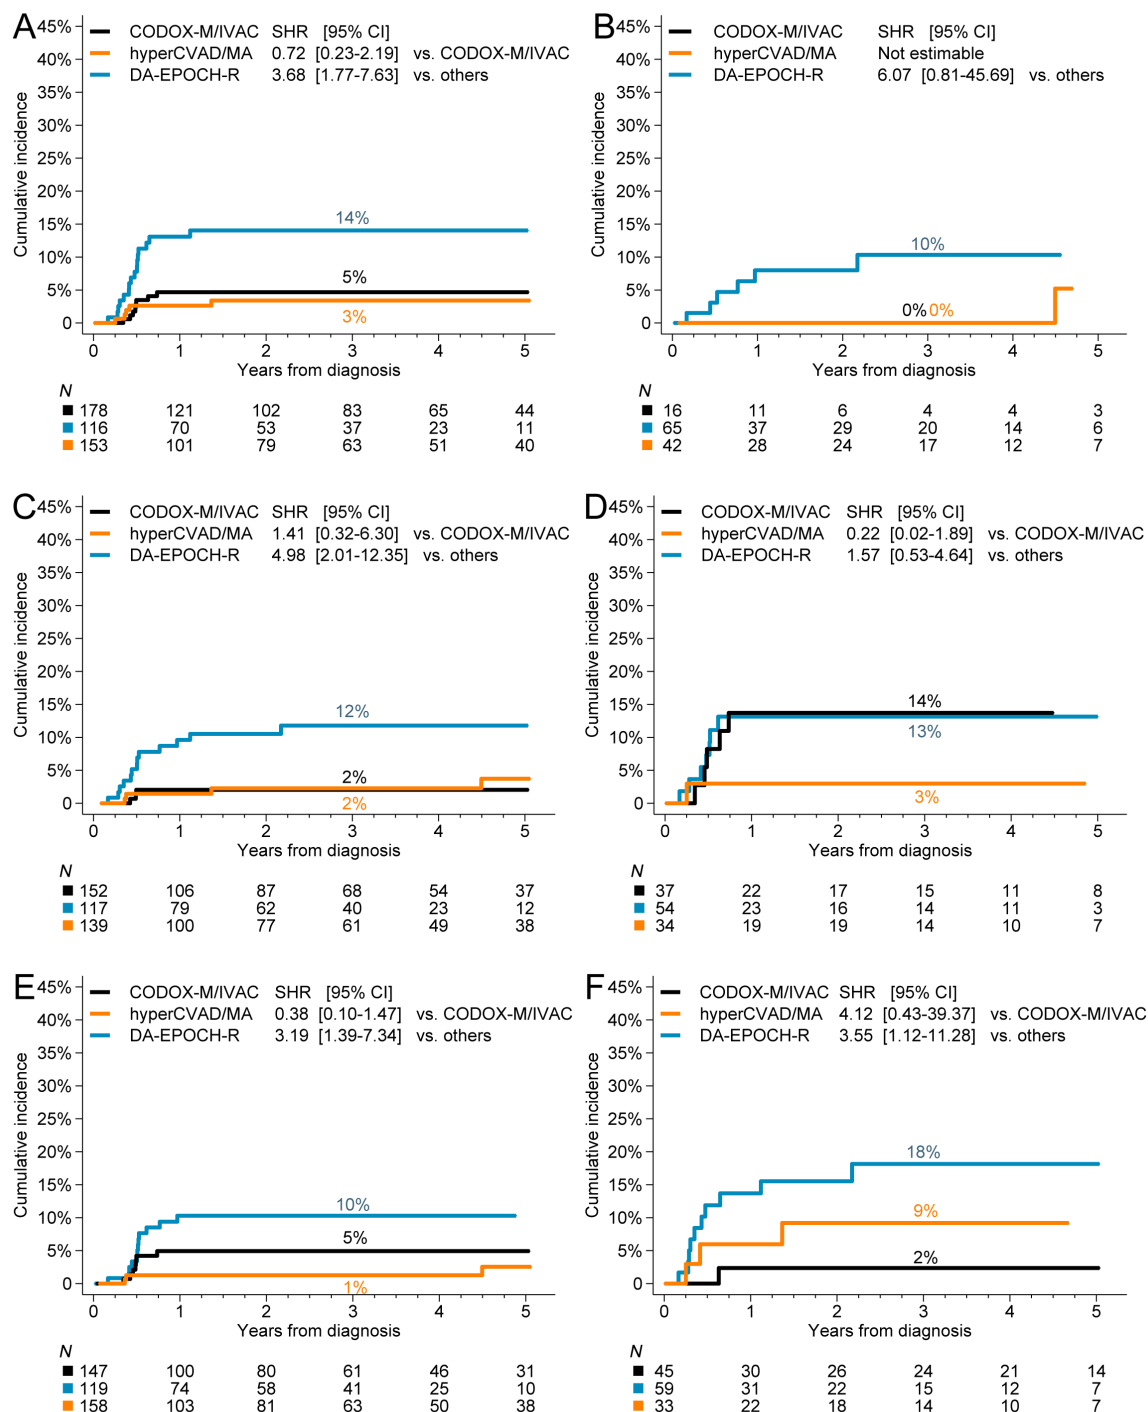

Supplement: 2020_270876_ZAYAC_SUPPL.pdf [file 2020_270876_ZAYAC_SUPPL.pdf]
